# Supplementary material for: Enhancement of Photoluminescence Quantum Yield and Stability in CsPbBr3 Perovskite Quantum Dots by Trivalent Doping
Source: MDPI journal article supplement (doi:10.3390/nano10040710), 2020-04-09
Supplement: s1 [file s1]

# Enhancement of Photoluminescence Quantum Yield and Stability in CsPbBr<sub>3</sub> Perovskite Quantum Dots by Trivalent Doping

Sujeong Jung <sup>1,†</sup>, Jae Ho Kim <sup>1,†</sup>, Jin Woo Choi <sup>1</sup>, Jae-Wook Kang <sup>2</sup>, Sung-Ho Jin <sup>3,\*</sup>, Youngho Kang <sup>4,5,\*</sup> and Myungkwan Song <sup>1,\*</sup>

<sup>1</sup> Surface Technology Division, Korea Institute of Materials Science (KIMS), 797 Changwondae-ro, Sungsan-Gu, Gyeongsangnam-do, Changwon 51508, Korea; sujeong2@kiost.ac.kr (S.J.); jho83@kims.re.kr (J.H.K.); jinwoo.choi@kims.re.kr (J.W.C.)

<sup>2</sup> Department of Flexible and Printable Electronics, Polymer Materials Fusion Research Center, Chonbuk National University, Jeonju 54896, Korea; jwkang@jbnu.ac.kr

<sup>3</sup> Department of Chemistry Education Graduate Department of Chemical Materials Institute for Plastic Information and Energy Materials, Pusan National University, Busan 46241, Korea

<sup>4</sup> Materials Data Center, Korea Institute of Materials Science (KIMS), 797 Changwondae-ro, Sungsan-Gu, Gyeongsangnam-do, Changwon 51508, Korea

<sup>5</sup> Department of Materials Science and Engineering, Incheon National University, Incheon 22012, Korea

\* Correspondence: shjin@pusan.ac.kr (S.-H.J.); youngho84@inu.ac.kr (Y.K.); smk1017@kims.re.kr (M.S.); Tel.: +82-(0)51-510-2727 (S.-H.J.); +82-(0)32-835-8606 (Y.K.); +82-(0)55-280-3686 (M.S.)

† These authors contributed equally to this project.

Received: 17 March 2020; Accepted: 4 April 2020; Published: date

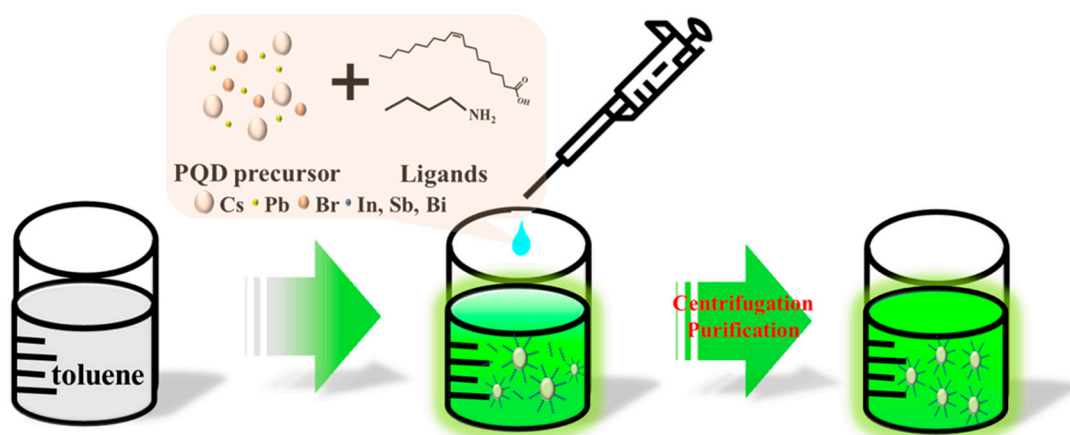

**Scheme S1.** Schematic of CsPbBr<sub>3</sub> synthesis *via* LARP method.

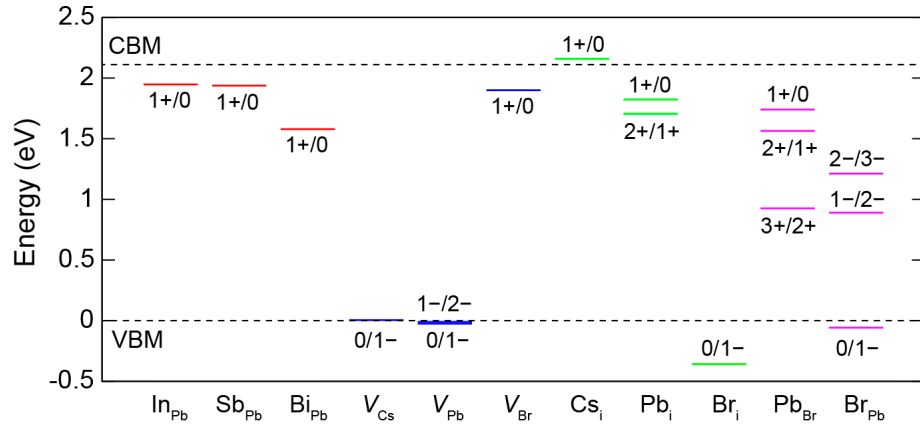

**Figure S1.** The position of the thermodynamic defect level of  $\epsilon((1 + )/0)$  for  $\text{In}_{\text{Pb}}$ ,  $\text{Sb}_{\text{Pb}}$ , and  $\text{Bi}_{\text{Pb}}$  as well as native defects such as vacancies and interstitials.

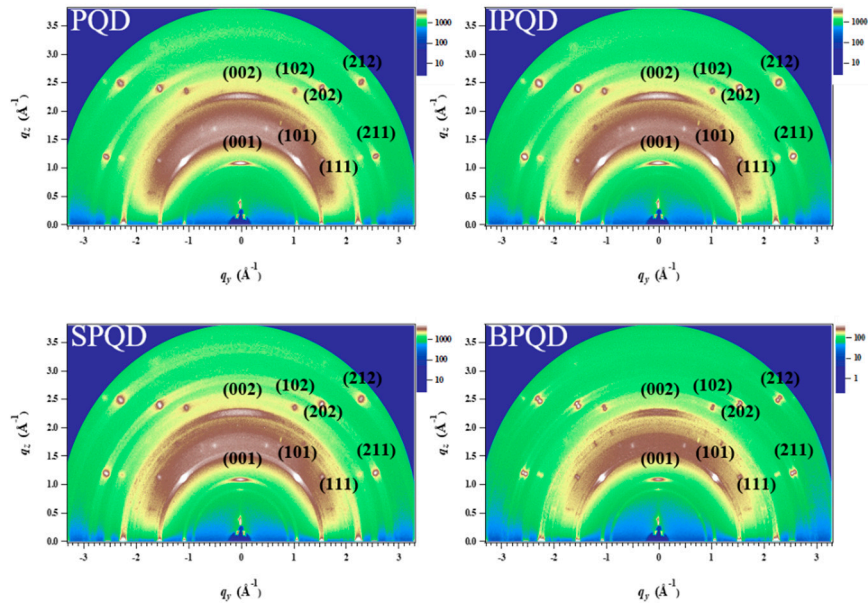

**Figure S2.** GIWAXS images of pure and 3 mol% In, 3 mol% Sb, and 1 mol% Bi substituted  $\text{CsPbBr}_3$  perovskite QDs.

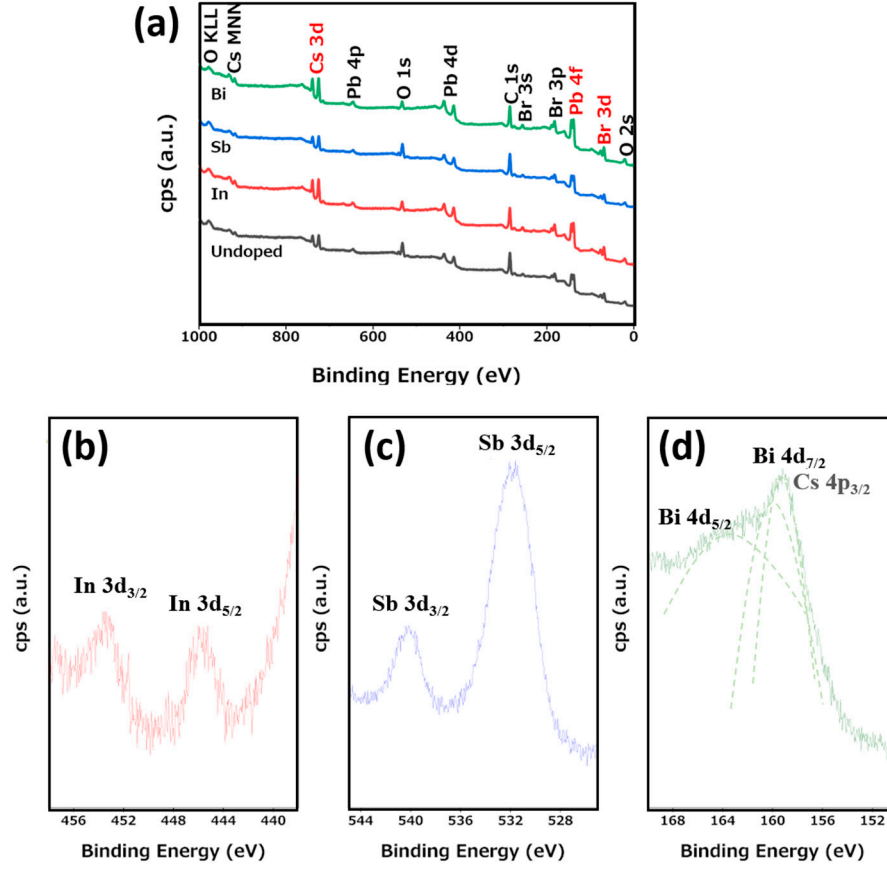

**Figure S3.** XPS spectra of (a) the pure and doped QDs consist of Cs, Pb, Br, C, and O, (b) In-, (c) Sb-, (d) Bi- substituted CsPbBr<sub>3</sub> QDs.

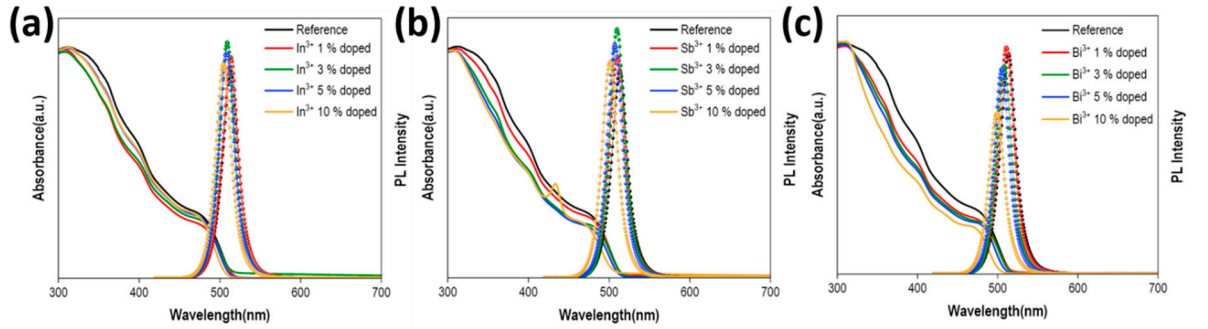

**Figure S4.** UV-Visible absorbance and PL emission spectra of (a) In- (b) Sb- (c) Bi- substituted CsPbBr<sub>3</sub> perovskite QDs with various doping concentration.

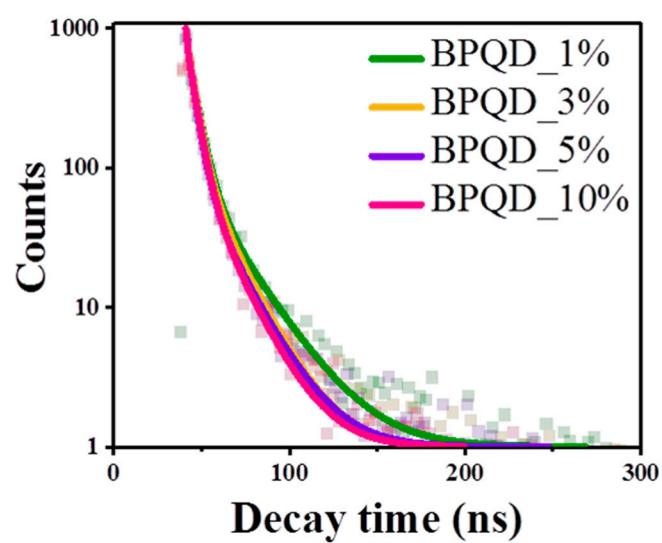

**Figure S5.** Time-resolved PL decay with fitting curve of 1 mol% Bi ion substituted CsPbBr<sub>3</sub> perovskite QDs.

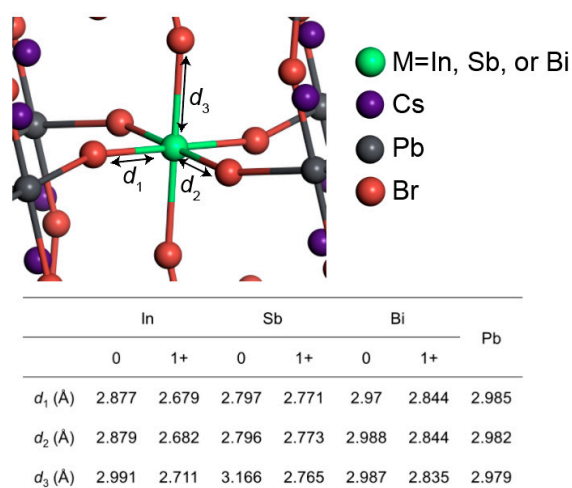

**Figure S6.** Schematic of the atomic structure and the information of lattice parameters of CsPbBr<sub>3</sub> perovskite QDs with substituted defects.

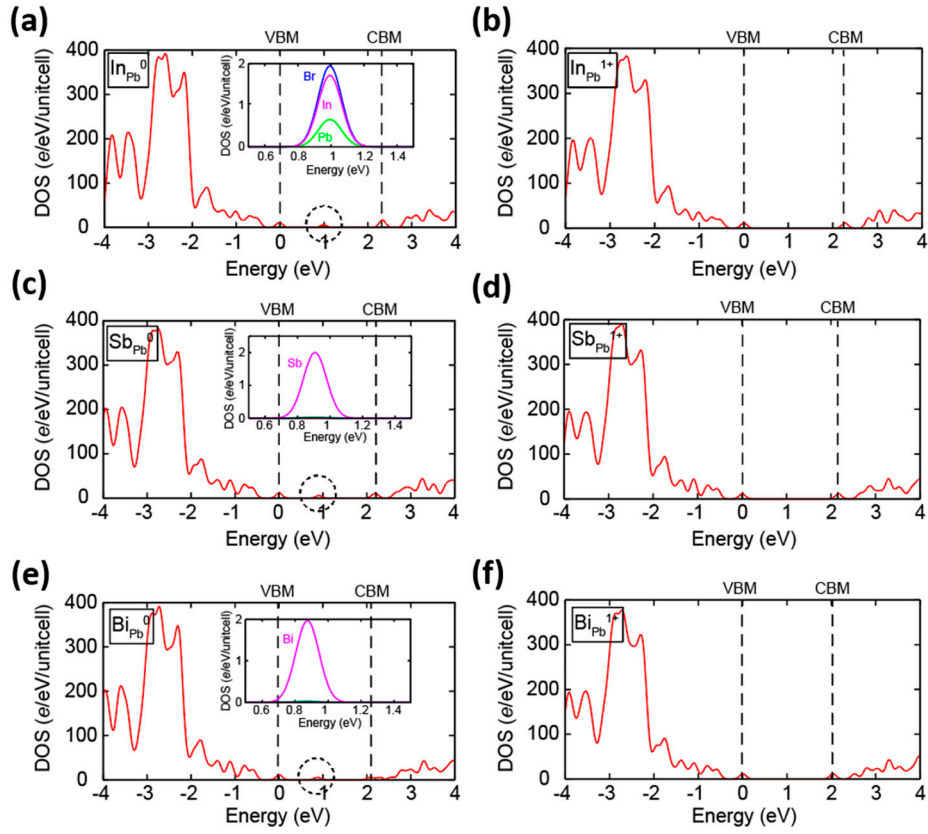

**Figure S7.** The electronic band structure and partial densities of states (DOS) of selected atoms such as (a)  $\text{InPb}^0$ , (b)  $\text{InPb}^{1+}$ , (c)  $\text{SbPb}^0$ , (d)  $\text{SbPb}^{1+}$ , (e)  $\text{BiPb}^0$ , and (f)  $\text{BiPb}^{1+}$ .

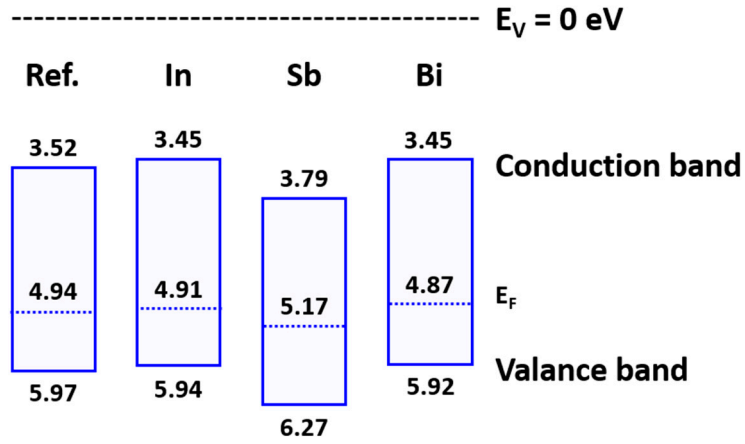

**Figure S8.** UPS spectra of pure and In-, Sb-, and Bi- ion substituted  $\text{CdPbBr}_3$  perovskite QDs.

**Table S1.** gaps of binary bromide crystal calculated using PBE+SOC calculations methods.

|               | <b>InBr3</b> | <b>SbBr3</b> | <b>BiBr3</b> | <b>PbBr2</b> |
|---------------|--------------|--------------|--------------|--------------|
| Band gap (eV) | 2.41         | 2.99         | 2.18         | 1.91         |

**Table S2.** composition ratio of atomic percentage of In-, Sb-, Bi- substituted CsPbBr<sub>3</sub> perovskite QDs.

|             | [at%] |      |      |     |     |     |
|-------------|-------|------|------|-----|-----|-----|
|             | Cs    | Pb   | Br   | In  | Sb  | Bi  |
| <b>Bi</b>   | 11.6  | 27.3 | 59.0 | -   | -   | 2.1 |
| <b>Sb</b>   | 10.8  | 29.1 | 58.3 | -   | 1.8 | -   |
| <b>In</b>   | 12.3  | 28.0 | 58.7 | 1.1 | -   | -   |
| <b>Ref.</b> | 13.5  | 27.9 | 58.5 | -   | -   | -   |
